# Supplementary material
Source: MDPI journal article supplement (https://www.mdpi.com/2312-7481/9/1/11)
Supplement: s1 [file s1]

## Supplementary Material

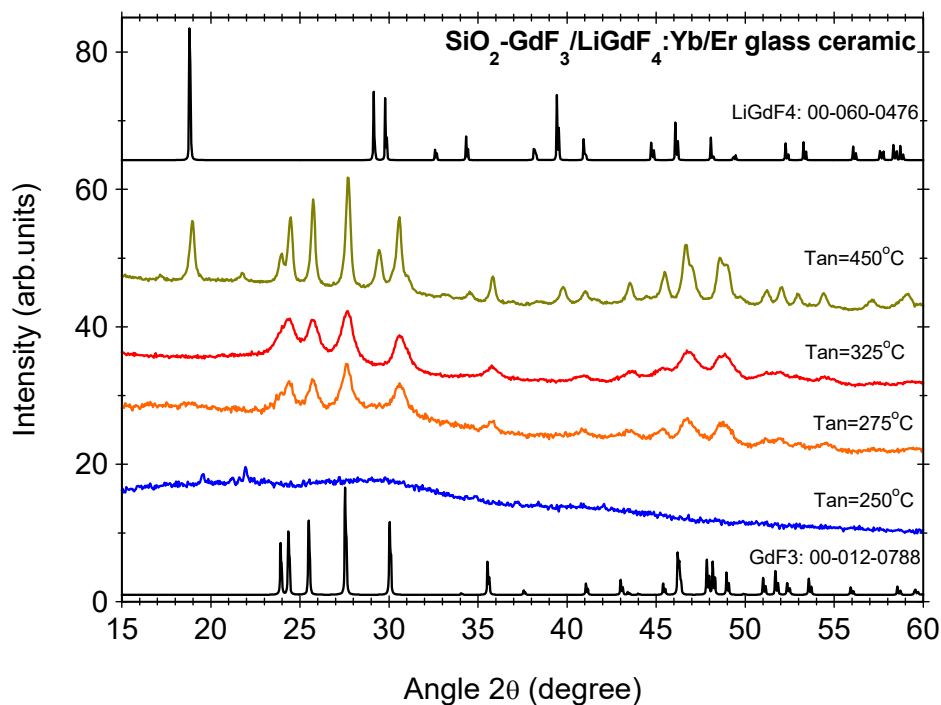

**Figure S1.** Normalized XRD patterns of the Yb<sup>3+</sup>/Er<sup>3+</sup>-doped SiO<sub>2</sub>-GdF<sub>3</sub>(x2Li mol.%) nano-glass ceramic annealed at different temperatures; the PDF files of GdF<sub>3</sub> and LiGdF<sub>4</sub> are also shown

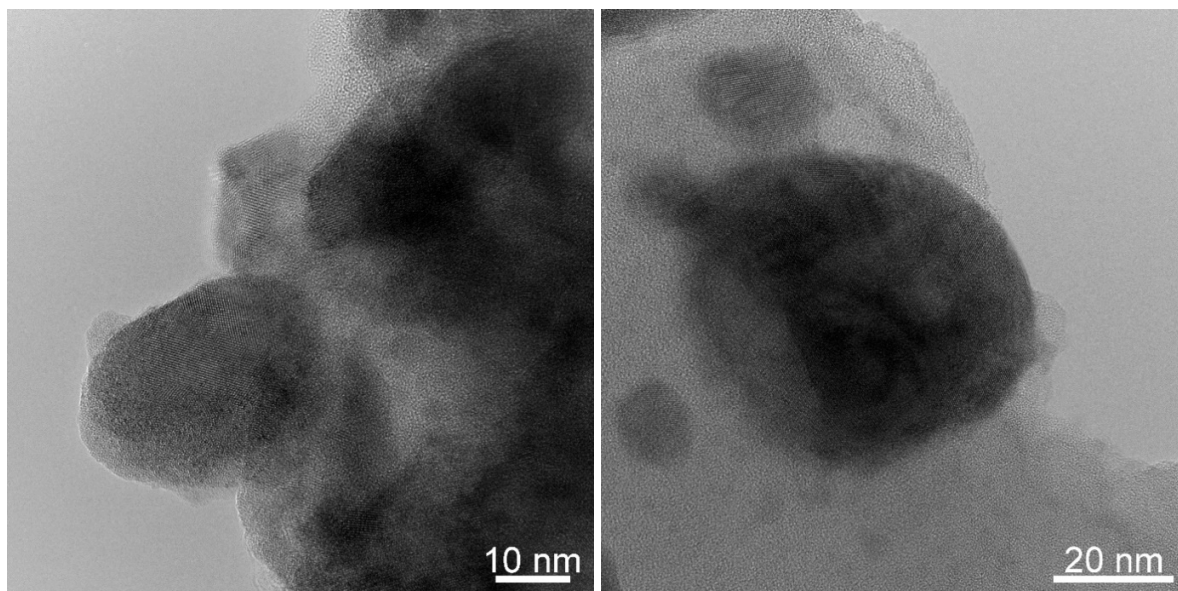

**Figure S2.** High-magnification TEM images of the nanoparticles within the Yb<sup>3+</sup>/Er<sup>3+</sup>-doped SiO<sub>2</sub>-GdF<sub>3</sub>(x2Li mol.%) nano-glass ceramic.

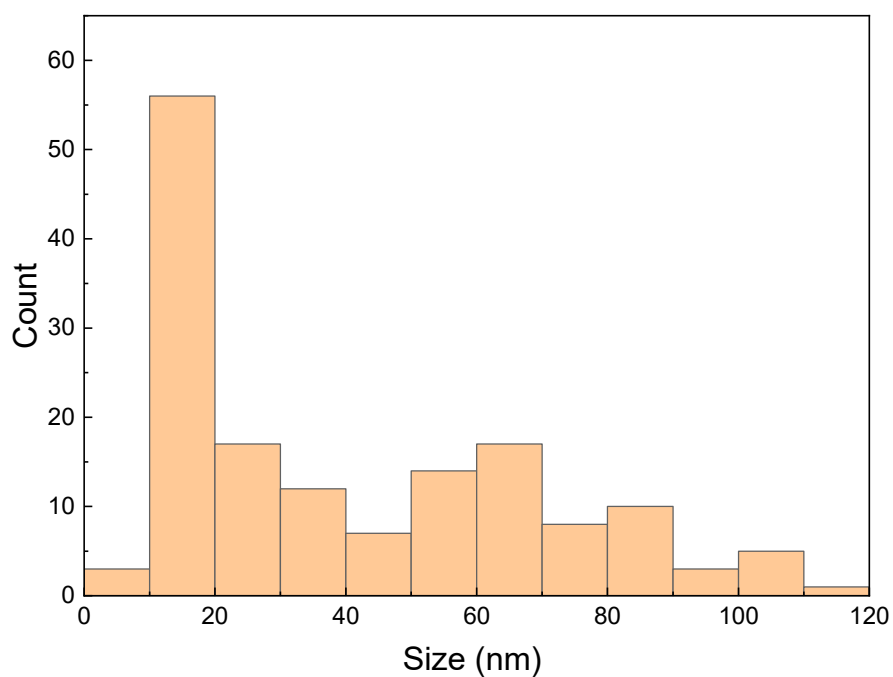

**Figure S3.** Nanocrystals size distribution of the nanoparticles within the Yb<sup>3+</sup>/Er<sup>3+</sup>-doped SiO<sub>2</sub>-GdF<sub>3</sub>(x2Li mol.%) Li2GC nano-glass ceramic

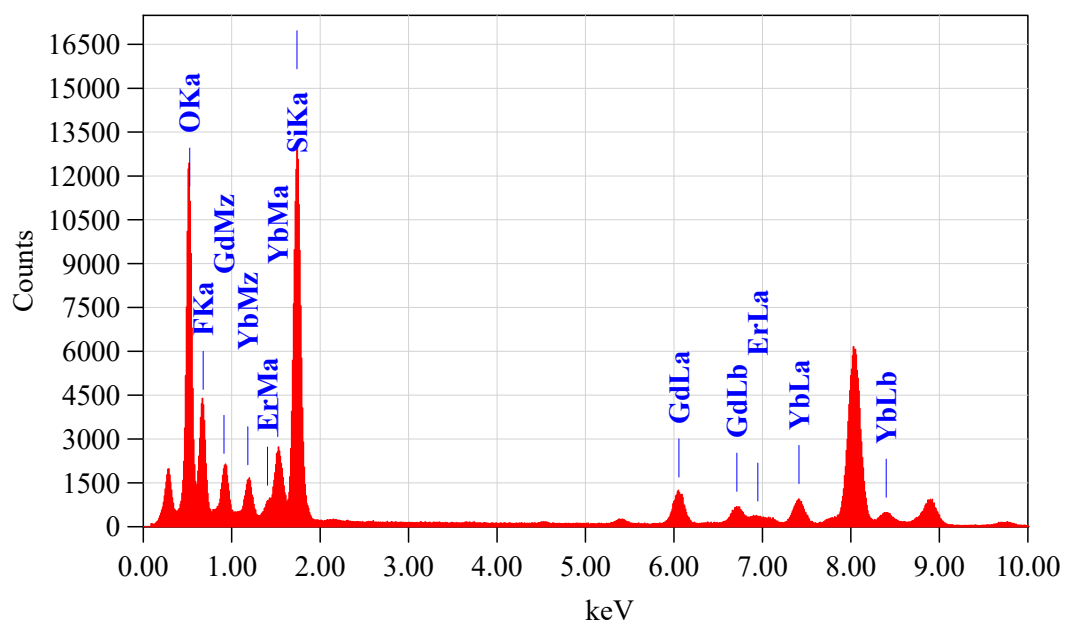

**Figure S4.** EDX spectra of the the Yb<sup>3+</sup>/Er<sup>3+</sup>-doped SiO<sub>2</sub>-GdF<sub>3</sub>(x2Li mol.%) Li2GC nano-glass ceramic.
